# Supplementary material
Source: MDPI journal article supplement (https://www.mdpi.com/2079-6412/9/4/232)
Supplement: s1 [file s1]

# Supplementary Materials: Super-Hydrophobic Co–Ni Coating with High Abrasion Resistance Prepared by Electrodeposition

Yanpeng Xue <sup>1,\*</sup>, Shuqiang Wang <sup>1,†</sup>, Peng Bi <sup>1</sup>, Guochen Zhao <sup>2</sup> and Ying Jin <sup>1,\*</sup>

<sup>1</sup> National Center for Materials Service Safety, University of Science and Technology Beijing, Beijing 100083, China; s20171185@xs.ustb.edu.cn (S.W.); s20161187@ustb.cn (P.B.)

<sup>2</sup> Shandong Provincial Key Laboratory for High Strength Lightweight Metallic Materials, Advanced Materials Institute, Qilu University of Technology (Shandong Academy of Sciences), Jinan 250000, China; zhaogch@sda.org

\* Correspondence: yanpengxue@ustb.edu.cn (Y.X.); yjin@ustb.edu.cn (Y.J.)

† These authors contributed equally to this work.

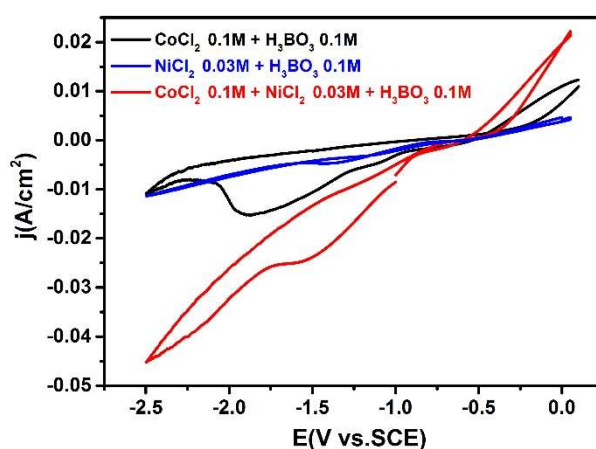

**Figure S1.** Cyclic voltammograms of carbon steel obtained with a scan rate of 10 mV/s in the solution of  $\text{CoCl}_2$  0.1 mol/L +  $\text{H}_3\text{BO}_3$  0.1 mol/L,  $\text{NiCl}_2$  0.03 mol/L +  $\text{H}_3\text{BO}_3$  0.1 mol/L,  $\text{CoCl}_2$  0.1 mol/L +  $\text{NiCl}_2$  0.03 mol/L +  $\text{H}_3\text{BO}_3$  0.1 mol/L.

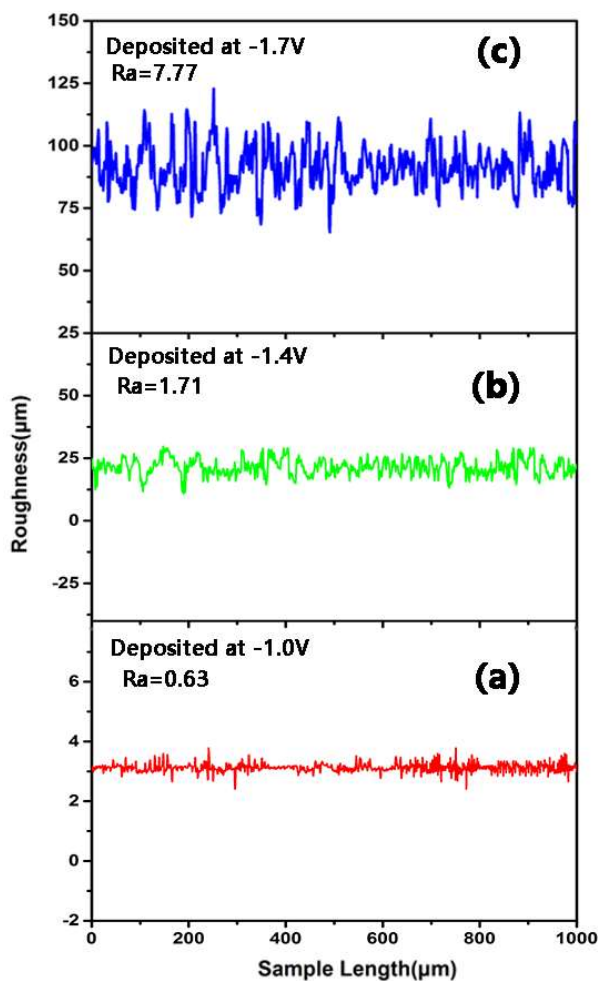

**Figure S2.** Surface roughness of Co–Ni coatings deposited under the applied potentials of (a)  $-1.0$  V, (b)  $-1.4$  V, and (c)  $-1.7$  V for 3000 s in the mixed solution at room temperature.

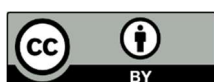

© 2019 by the authors. Licensee MDPI, Basel, Switzerland. This article is an open access article distributed under the terms and conditions of the Creative Commons Attribution (CC BY) license (<http://creativecommons.org/licenses/by/4.0/>).
